# Identification and Characterization of Microcin S, a New Antibacterial Peptide Produced by Probiotic *Escherichia coli* G3/10

Anke Zschüttig<sup>1</sup>, Kurt Zimmermann<sup>2</sup>, Jochen Blom<sup>3</sup>, Alexander Goesmann<sup>3</sup>, Christoph Pöhlmann<sup>4</sup>, Florian Gunzer<sup>1\*</sup>

**1** Institute of Medical Microbiology and Hygiene, TU Dresden, Dresden, Germany, **2** SymbioPharm GmbH, Herborn-Hörsbach, Germany, **3** CeBITec, University of Bielefeld, Bielefeld, Germany, **4** Abteilung für Labormedizin, Robert Bosch Krankenhaus, Stuttgart, Germany

## Abstract

*Escherichia coli* G3/10 is a component of the probiotic drug Symbioflor 2. In an *in vitro* assay with human intestinal epithelial cells, *E. coli* G3/10 is capable of suppressing adherence of enteropathogenic *E. coli* E2348/69. In this study, we demonstrate that a completely novel class II microcin, produced by probiotic *E. coli* G3/10, is responsible for this behavior. We named this antibacterial peptide microcin S (MccS). Microcin S is coded on a 50.6 kb megaplasmid of *E. coli* G3/10, which we have completely sequenced and annotated. The microcin S operon is about 4.7 kb in size and is comprised of four genes. Subcloning of the genes and gene fragments followed by gene expression experiments enabled us to functionally characterize all members of this operon, and to clearly identify the nucleotide sequences encoding the microcin itself (*mcsS*), its transport apparatus and the gene *mcsI* conferring self immunity against microcin S. Overexpression of cloned *mcsI* antagonizes MccS activity, thus protecting indicator strain *E. coli* E2348/69 in the *in vitro* adherence assay. Moreover, growth of *E. coli* transformed with a plasmid containing *mcsS* under control of an *araC* PBAD activator-promoter is inhibited upon *mcsS* induction. Our data provide further mechanistic insight into the probiotic behavior of *E. coli* G3/10.

**Citation:** Zschüttig A, Zimmermann K, Blom J, Goesmann A, Pöhlmann C, et al. (2012) Identification and Characterization of Microcin S, a New Antibacterial Peptide Produced by Probiotic *Escherichia coli* G3/10. PLoS ONE 7(3): e33351. doi:10.1371/journal.pone.0033351

**Editor:** Stefan Bereswill, Charité-University Medicine Berlin, Germany

**Received:** January 5, 2012; **Accepted:** February 13, 2012; **Published:** March 30, 2012

**Copyright:** © 2012 Zschüttig et al. This is an open-access article distributed under the terms of the Creative Commons Attribution License, which permits unrestricted use, distribution, and reproduction in any medium, provided the original author and source are credited.

**Funding:** This work has been funded by restricted research grants of the Federal Ministry of Education and Research (BMBF GenomikTransfer, PROtumor consortium, # 0315590A) and of SymbioPharm GmbH(# 100\_2847) to FG. The funders had no role in study design, data collection and analysis, decision to publish, or preparation of the manuscript.

**Competing Interests:** The authors have read the journal's policy and they have the following conflicts. KZ is an employee of SymbioPharm. FG, AZ and KZ have submitted a patent application disclosing the discovery of "Bacterially formed microcin S, a new antimicrobial peptide, effective against pathogenic microorganisms" (EP 11177451). This does not alter the authors' adherence to all the PLoS ONE policies on sharing data and materials.

\* E-mail: florian.gunzer@tu-dresden.de

## Introduction

Microcins are ribosomally synthesized antimicrobial peptides with a low molecular mass. Produced by enterobacteria, mostly *Escherichia coli*, microcin synthesis is sharply activated under stress conditions such as limitation of nutrients [1–4]. Microcins exert potent antibacterial activity against closely related species, which offers a highly competitive advantage in the intestinal microflora [5]. Microcin-producers are resistant to the microcin they produce, which is mediated by at least one resistance-conferring gene located within one gene cluster. Most of the 14 known microcins are plasmid-encoded [5–10], but chromosomally-encoded antibacterial peptides have also been described [11]. The probiotic strain *E. coli* Nissle 1917 (EcN) is known to produce microcins M and H47 [12]. In this study we show that probiotic *E. coli* G3/10 produces a novel microcin, that we named microcin S (MccS). *E. coli* G3/10 is one of six *E. coli* genotypes present in the probiotic drug Symbioflor 2 (DSM17252). The product has been successfully used for the treatment of functional gastrointestinal disorders, in particular irritable bowel syndrome in adults and children [13,14]. Probiotics are defined as living microorganisms, which upon ingestion in certain numbers, exert health benefits beyond inherent basic nutrition [15]. The mechanisms that enable

a strain to serve as a probiotic are poorly understood. Nevertheless, the antimicrobial activity of microcins could positively influence the stability of the intestinal microflora. Given its extensive clinical safety record, a microcin-producing strain containing no virulence factors can clearly fulfill the definition of a probiotic. In contrast to enterobacterial microcins, food-borne lactic acid bacteria produce lantionine-containing peptide antibiotics. The so-called lantibiotics of gram-positive bacteria are already used for food preservation [16]. The use as an antitumor agent [17] or as an alternative to classical antibiotics in infectious diseases [18,19] are two further applications where bacteriocins may provide therapeutic alternatives in the future. The worldwide emergence of pathogens resistant to antibiotics has led to an ever-increasing demand of new antibacterial agents. Enterobacterial microcins could offer exciting new possibilities for prophylaxis and treatment of bacterial infections. Here we present the identification and functional characterization of microcin S, a completely novel plasmid encoded bacteriocin produced by probiotic *E. coli* G3/10. Microcin S is able to inhibit the adherence of enteropathogenic *E. coli* (EPEC) strain E2348/69 to intestinal epithelial cells in an *in vitro* adherence assay and growth of *E. coli* is hampered by L-arabinose induced recombinant expression of MccS.

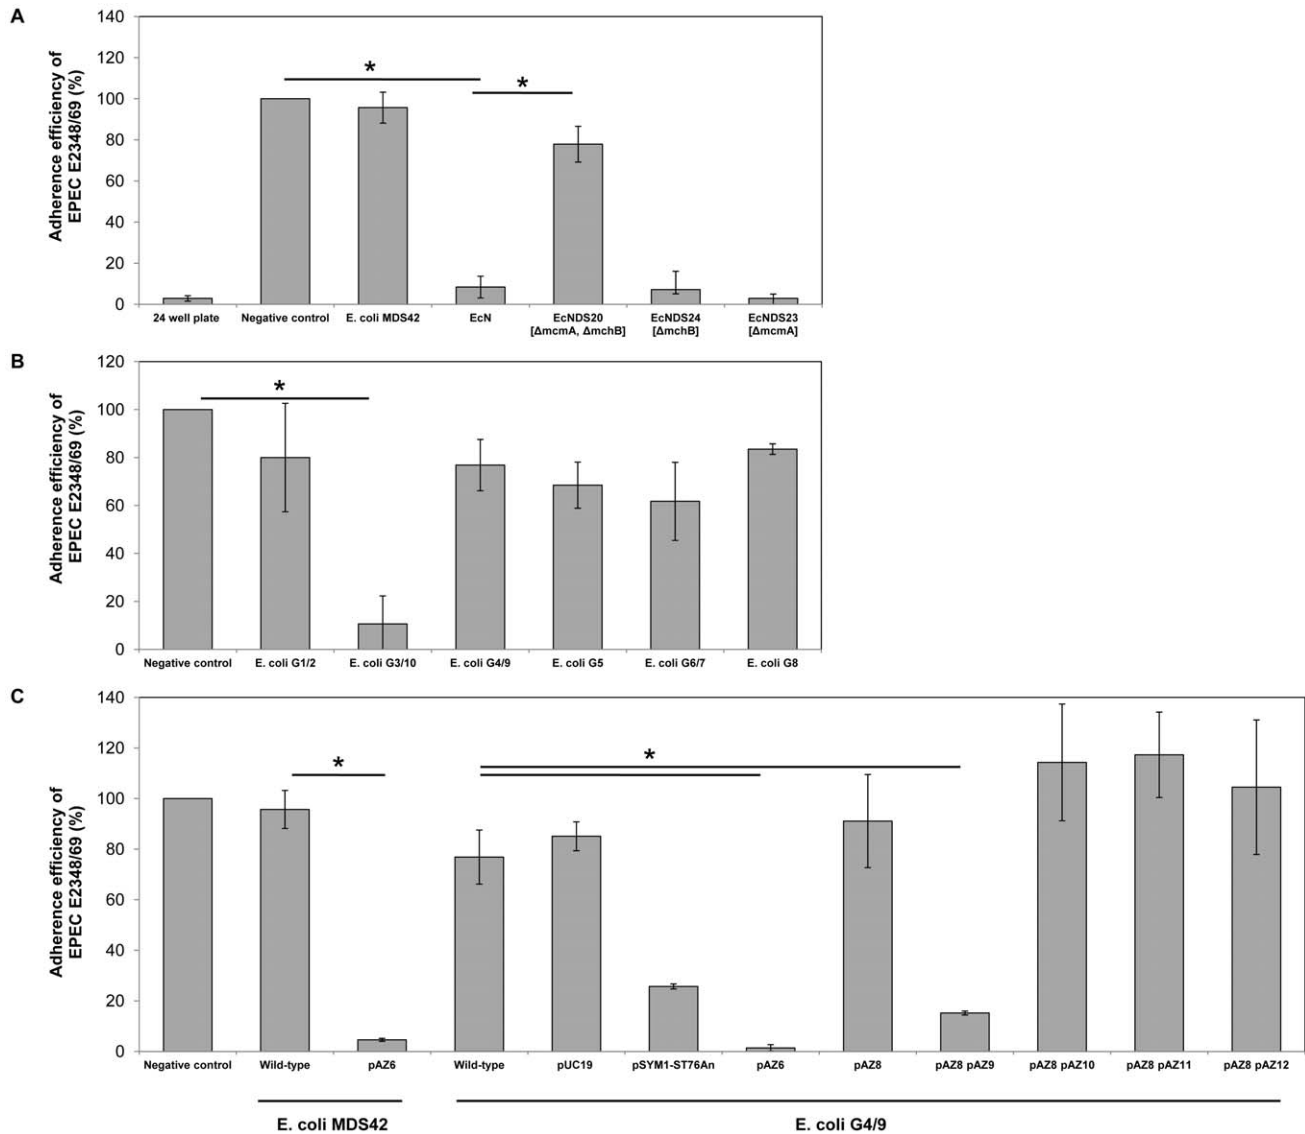

**Figure 1. Adherence efficiency of EPEC E2348/69 to human intestinal epithelial cells after pre-incubation with *E. coli* Nissle 1917 (EcN) and EcN deletion strains (EcNDS) (A); *E. coli* G1/2, *E. coli* G3/10, *E. coli* G4/9, *E. coli* G5, *E. coli* G6/7 and *E. coli* G8, the components of Symbioflor 2 (DSM17252) (B); *E. coli* strains MDS42 and G4/9 wild-type and appropriate mutants (C).** Confluent monolayers of CACO-2 or LOVO cells were pre-incubated with bacterial test strains at an MOI of 100:1 *E. coli* to host cells. After two hours of incubation, cells were washed and infected with EPEC E2348/69 using an MOI of 100:1 EPEC to host cells. Adherence efficiency in % is expressed as adherence of EPEC relative to the adherence without any pre-incubation (negative control), which is set at 100%. Pre-incubation of human intestinal epithelial cells with EcN significantly reduces adherence efficiency of EPEC E2348/69, comparable to the mutant strains EcNDS24 and EcNDS23 which carry single genomic deletions of either microcin H47 precursor (*mchB*; EcNDS24) or microcin M precursor (*mcmA*; EcNDS23). However, this phenomenon cannot be observed, when double microcin mutant EcNDS20 is used (A). The adherence efficiency of EPEC E2348/69 is also significantly reduced in the presence of microcin S, either expressed by *E. coli* G3/10 wild-type (B) or by *E. coli* strains MDS42 and G4/9, transformed with plasmids pSYM1-ST76An (*mcsS*, *mcsI*, *mcsA*, *mcsB*), pAZ6 (*mcsS*, *mcsI*, *mcsA*, *mcsB*) or pAZ9 (*mcsS*) (C). With all further plasmids, pAZ8 (*mcsI*, *mcsA*, *mcsB*), pAZ10 (ORF1), pAZ11 (ORF2) and pAZ12 (*mcsS*<sub>193–363</sub>), the indicator strains *E. coli* MDS42 and G4/9 did not inhibit adherence of EPEC E2348/69 to intestinal epithelial cells (C). Data are the mean  $\pm$  SD of at least three separate experiments in duplicate wells. \*  $p \leq 0.01$  compared to negative controls or wild-type strains. doi:10.1371/journal.pone.0033351.g001

## Results

### Evaluation of the In vitro Adherence Assay

Bacterial adhesion is a crucial first step of many infectious diseases. Therefore, a test system quantifying adherence inhibition of enteropathogens to human intestinal epithelial cells is a suitable model system to evaluate this beneficial effect to the host. Initially, we used enteropathogenic *E. coli* strain E2348/69 [20] to investigate adherence efficiency to human intestinal epithelial cells

(LOVO or CACO-2) in response to a pre-incubation with different probiotic or non-probiotic *E. coli* isolates. We demonstrated that EcN significantly inhibits EPEC adherence (Fig. 1A), which is consistent with the results of Kleta et al. [21] who used a similar assay with porcine intestinal IPEC-J2 cells. Since EcN produces two different microcins M and H47 [12], we assumed that the observed effect resulted from those antibacterial peptides, which can inhibit bacterial growth and kill target bacteria. Indeed, we were able to show that an EcN deletion strain (EcNDS20),



into pBR322 leading to pAZ8 (Table 1). Small ORFs upstream of this operon (Fig. 3), which were candidate microcin-encoding genes, were cloned into pACYC184 and subcloned into *E. coli* G4/9 pAZ8. With this strategy we successfully managed a sequential plasmid-based identification and characterization of potential microcin-coding regions together with the respective microcin-helper proteins. Only *E. coli* G4/9, containing plasmids pAZ8 and pAZ9 (Table 1) together, significantly inhibited EPEC adherence, whereas *E. coli* G4/9 pAZ8 affected EPEC adherence similar to that of *E. coli* G4/9 wild-type (Fig. 1C). We therefore concluded that the small gene cloned into pAZ9, which we termed *mcsS*, encodes a novel *E. coli* microcin, named microcin S in the following. Truncated *mcsS* (pAZ12; Table 1) resulting from an alternative ORF did not show microcin activity in the *in vitro* adherence assay (Fig. 1C).

### Microcin S Immunity

Class II microcins are characterized by a dedicated self-immunity protein. Gene *mcsI* adjacent to *mcsS* shows homology to the CAAX amino terminal protease family potentially involved in microcin self-immunity. No signal sequence or transmembrane helices are predicted. We transformed *mcsI* into EPEC strain E2348/69 using either pAZ8 (*mcsI*, *mcsA*, *mcsB*), pAZ13 (*mcsI*) or pAZ14 (*mcsI*, truncated). We could show that the EPEC strain carrying the complete *mcsI* gene (pAZ8 or pAZ13) is resistant to microcin S-producing *E. coli* G3/10 or *E. coli* G4/9 pAZ6 in the *in vitro* adherence assay. Truncated *mcsI* (pAZ14) was not able to confer microcin S resistance. Therefore we identified gene *mcsI*, which encodes a 216 amino acid protein, as responsible for microcin S self-immunity. Additionally, we demonstrated that *mcsI* is not effective against EcN microcins M and H47 (Fig. 4).

### Investigation of Microcin S Activity in *E. coli* MDS42

In order to directly demonstrate microcin S activity against a susceptible *E. coli* strain, *mcsS* was cloned into pGS1 resulting in the plasmid pAZ15 (Table 1). In this construct, *mcsS* expression is

controlled by an *araC* PBAD activator-promoter, rendering microcin S expression inducible by L-arabinose. When *E. coli* MDS42 [23] growing in liquid culture after being transformed with pAZ15 was treated with 0.2% v/v L-arabinose at the beginning of the logarithmic phase after 1.5 h,  $A_{600}$  remained almost stable around 0.3 while absorbance of control cultures increased constantly (Fig. 5A). Counts of colony forming units (CFU) taken at various time points during this experiment revealed a sharp drop in the number of viable bacteria in the L-arabinose induced culture of *E. coli* MDS42+pAZ15 while CFU of the other cultures rose to a maximum of  $1.4 \times 10^9$ / ml (Fig. 5B).

### Presence of Microcin S Gene in Enterobacteriaceae

The sequences of *mcsS* and *mcsI* were listed very recently (04.09.2011) as new entries in the NCBI database, being part of the 54 kb megaplasmid pMO17\_54 (accession # HE578057) of *Shigella* sp. MO17. The proteins derived from these coding sequences, termed pMO17\_54\_21 and pMO17\_54\_23, were described as hypothetical proteins and no function was assigned to them. Nevertheless, a complete MccS operon is not listed in NCBI (as of 21.10.2011). A further 38 *E. coli*, two *Shigella* and two *Salmonella* strains were screened for *mcsS* using a multiplex PCR protocol. We were unable to detect the *mcsS* gene in any of the 42 human and veterinary isolates or the laboratory strains tested (Fig. 6).

### Discussion

Microcins are small ribosomally synthesized peptides produced by enterobacteria. We could show that *E. coli* G3/10, an *E. coli* genomotype of Symbioflor 2 (DSM17252), encodes and produces a completely novel class II microcin, named microcin S. The term microcin was introduced to distinguish this class of antibacterial peptides with a size <10 kDa from colicins with a higher molecular mass [24]. Genome sequencing of *E. coli* G3/10 enabled us to identify the gene *mcsS*, located on plasmid pSYM1, encoding the 120 amino acid (aa) microcin S precursor peptide. It has a calculated molecular weight of 11.67 kDa and is therefore the largest of all currently known microcins. Using the Pfam database [25] microcin S can be classified as a class II bacteriocin with a double-glycine leader peptide. Indeed, its amino acid sequence reveals a glycine-rich peptide with a double-glycine cleavage site and cysteines probably involved in formation of a disulfide bond (Fig. 3). These characteristics, together with the organization of the microcin gene cluster (Fig. 3), indicate MccS to be a member of the class IIa microcins. The current classification follows a discussion of Duquesne et al. [26] and Rebuffat [27]. MccV (formerly colicin V), MccL and Mcc24 are three members assigned to the microcin class IIa. All are composed of four plasmid-borne genes, mostly harbored by large conjugative low-copy-number plasmids [7,10]. The genes for MccV and MccL, *cvaC* and *mclC*, encode 103 and 105 aa precursors, which also constitute higher-molecular mass microcins. Both peptides form disulfide bonds [28,29]. Class IIa microcins have leader peptides whose cleavage results in the mature biologically active peptide. Furthermore, they are not subject to post-translational modification. Gene clusters of all class IIa microcins consist of four genes organized in one or two transcription units: the gene encoding the microcin precursor, a self-immunity protein, an accessory protein involved in the secretion of the microcin, and an ATP-binding cassette (ABC)-transporter (for reviews see [26,30]). The self-immunity genes code for small peptides that protect the producing strain from its own microcin. Here we can show that gene *mcsI* cloned into EPEC E2348/69 confers immunity to MccS. Gene

**Table 1.** Plasmids used in this study.

| Plasmid      | Resistance       | Relevant genotype                                     | Origin    |
|--------------|------------------|-------------------------------------------------------|-----------|
| pSYM1        | None             | <i>mcsS</i> , <i>mcsI</i> , <i>mcsA</i> , <i>mcsB</i> | This work |
| pST76-A      | Amp <sup>r</sup> | <i>ori</i> <sup>TS</sup> (30°C)                       | [43]      |
| pSYM1-ST76An | Amp <sup>r</sup> | <i>mcsS</i> , <i>mcsI</i> , <i>mcsA</i> , <i>mcsB</i> | This work |
| pAZ6         | Amp <sup>r</sup> | <i>mcsS</i> , <i>mcsI</i> , <i>mcsA</i> , <i>mcsB</i> | This work |
| pAZ8         | Amp <sup>r</sup> | <i>mcsI</i> , <i>mcsA</i> , <i>mcsB</i>               | This work |
| pAZ9         | Cm <sup>r</sup>  | <i>mcsS</i>                                           | This work |
| pAZ10        | Cm <sup>r</sup>  | ORF1                                                  | This work |
| pAZ11        | Cm <sup>r</sup>  | ORF2                                                  | This work |
| pAZ12        | Cm <sup>r</sup>  | <i>mcsS</i> <sub>193-363</sub>                        | This work |
| pAZ13        | Amp <sup>r</sup> | <i>mcsI</i>                                           | This work |
| pAZ14        | Amp <sup>r</sup> | <i>mcsI</i> <sub>361-651</sub>                        | This work |
| pGS1         | Amp <sup>r</sup> | PBAD                                                  | This work |
| pAZ15        | Amp <sup>r</sup> | PBAD, <i>mcsS</i>                                     | This work |

Amp<sup>r</sup> = ampicillin resistance; Cm<sup>r</sup> = chloramphenicol resistance; ORF = open reading frame; PBAD = *araC* PBAD activator-promoter.

doi:10.1371/journal.pone.0033351.t001

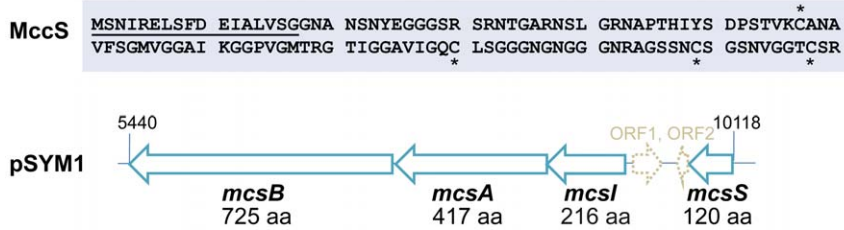

**Figure 3. The MccS gene cluster.** The upper panel shows the amino acid sequence of the microcin S precursor. A probable leader peptide is underlined. Asterisks indicate cysteines possibly involved in the formation of a disulfide bond typical for class II microcins. The microcin S gene cluster on megaplasmid pSYM1 (lower panel) consists of the four clustered genes *mcsS*, *mcsI*, *mcsA* and *mcsB*. ORF1 and ORF2 revealed no bactericidal activity.

doi:10.1371/journal.pone.0033351.g003

*mcsI* encodes a 216 aa protein of the CAAX amino terminal protease protein family. The two genes comprising the MccS export system are *mcsA* and *mcsB* (Fig. 3). Gene *mcsA* is a member of the *E. coli* HlyD family and shows little homology to the colicin secretion protein CvaA. Gene *mcsB* encodes an ABC-transporter consisting of a transmembrane domain, an ATP-binding domain and a peptidase domain [25]. The nucleotide lengths of *mcsA* and *mcsB* from the MccS operon, 1254 bp and 2178 bp respectively, are comparable to export genes of the other microcins MccV (*avaA*, 1242 bp; *avaB*, 2097 bp), MccL (*mclA*, 1242 bp; *mclB*, 2097 bp) and Mcc24 (*mtfA*, 1245 bp; *mtfB*, 2124 bp) [26]. The sensitivity of

microorganisms to microcins can generally be shown by a standard agar diffusion test, for example with the microcin-producing strain spotted onto an agar plate and an indicator strain inoculated into a soft agar overlay [12]. However, *E. coli* G3/10 does not produce real inhibition zones in agar diffusion tests (data not shown). This phenomenon can possibly be explained by the widely unknown conditions for effective MccS expression. Motivated by the fact that synthesis of MccV is repressed by excess iron [31], we added the iron chelator Desferal to the solid media growing *E. coli* G3/10 in the diffusion test. However, microcin production on agar plates could still not be shown. We

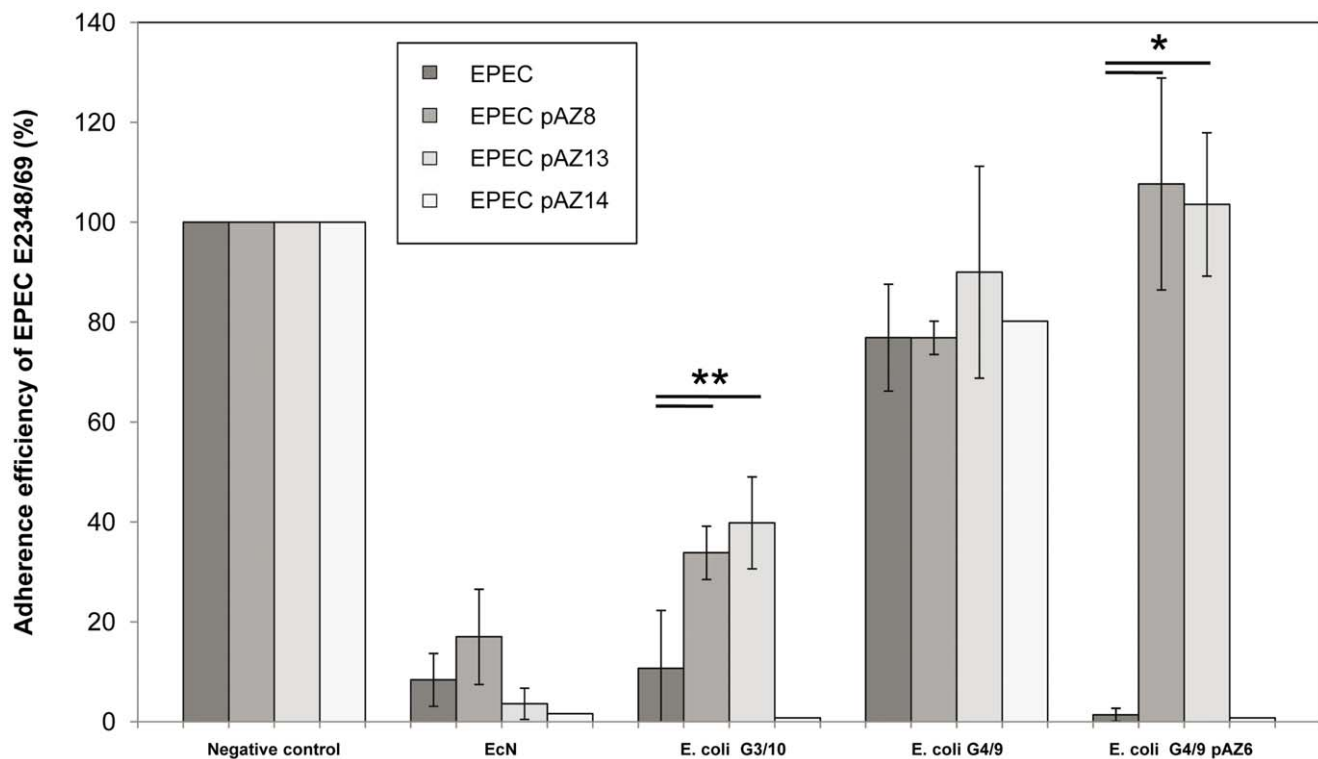

**Figure 4. Adherence efficiency of wild-type and mutant strains of EPEC E2348/69 to human intestinal epithelial cells after pre-incubation with different microcin positive and negative *E. coli* strains.** Confluent monolayers of CACO-2 or LOVO cells were pre-incubated with bacterial test strains EcN, *E. coli* G3/10, microcin-negative *E. coli* G4/9 wild-type or microcin S expressing *E. coli* G4/9 pAZ6 at an MOI of 100:1 *E. coli* to host cells. After two hours of incubation, cells were washed and infected with EPEC E2348/69 using an MOI of 100:1 EPEC to host cells. Adherence efficiency in % is expressed as adherence of EPEC relative to the adherence without any pre-incubation (negative control), which is set at 100%. In EPEC E2348/69 plasmids pAZ8 (*mcsI*, *mcsA*, *mcsB*) and pAZ13 (*mcsI*) containing full-length gene *mcsI* confer immunity to *mcsS* expressing strains *E. coli* G3/10 and *E. coli* G4/9 pAZ6. However, EPEC indicator strain transformed with pAZ14 carrying truncated *mcsI*361-651 is not resistant to microcin S. None of the plasmids used procures immunity against EcN microcins H47 and M. Data are the mean±SD of at least three separate experiments in duplicate wells. \*  $p \leq 0.01$ , \*\*  $p \leq 0.05$ .

doi:10.1371/journal.pone.0033351.g004



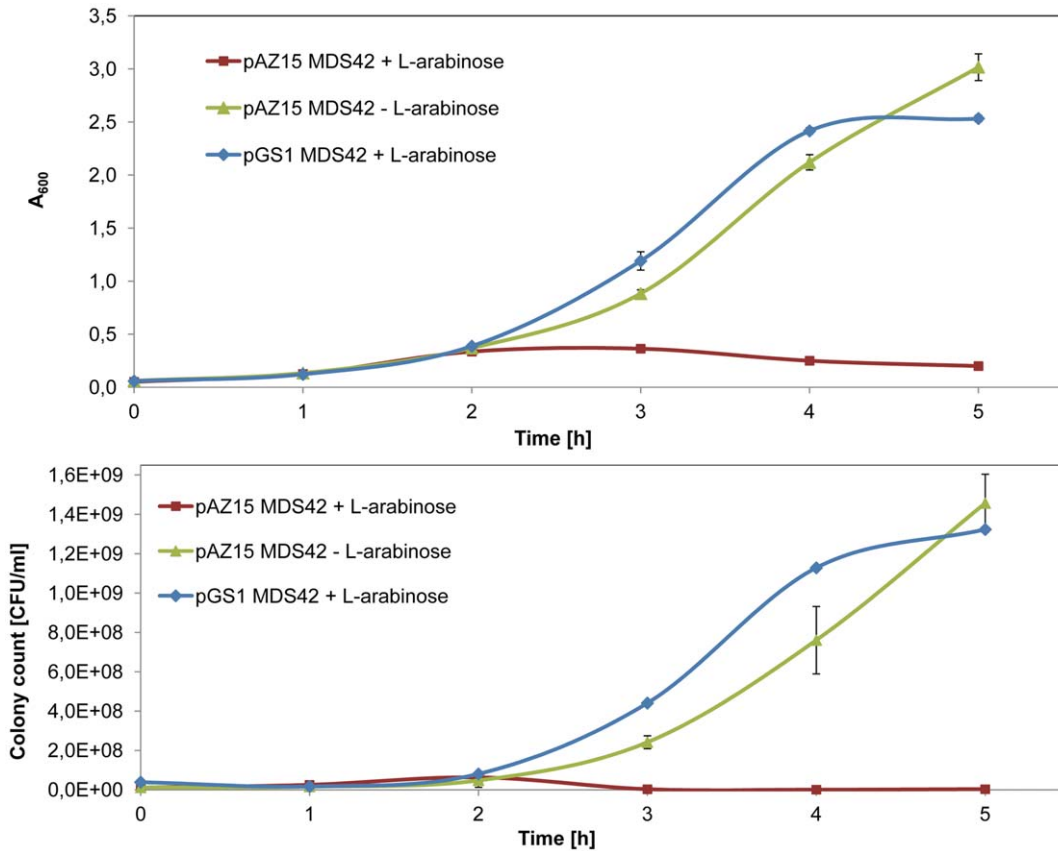

**Figure 5. Growth curve of *E. coli* MDS42 with pAZ15 or pGS1 showing A<sub>600</sub> (A) and colony count of viable cells (B).** pAZ15 is a vector containing *mcsS* under control of the L-arabinose-induced *araC* PBAD activator-promoter. Induction with L-arabinose of the respective cultures, as indicated in the legend to panel A and B, was carried out after 90 minutes. pGS1 is the empty vector with the *araC* PBAD activator-promoter. *E. coli* MDS42 with pAZ15 shows a significant reduction of its A<sub>600</sub> as well as of its colony counts after induction with L-arabinose (red squares) compared to growth without induction (green triangles) and also with the vector devoid of *mcsS* (pGS1, blue rhombi). Data are the mean ± SD of three independent experiments.  
doi:10.1371/journal.pone.0033351.g005

therefore assume that other factors, such as pH or nutrients, may be involved in the regulation of microcin S expression. Because the adherence assay provides only indirect proof of the antibacterial

activity of MccS-producing *E. coli* strains and the above mentioned agar diffusion test did not work properly with microcin S, we decided to subclone *mcsS* under the control of an *araC* PBAD

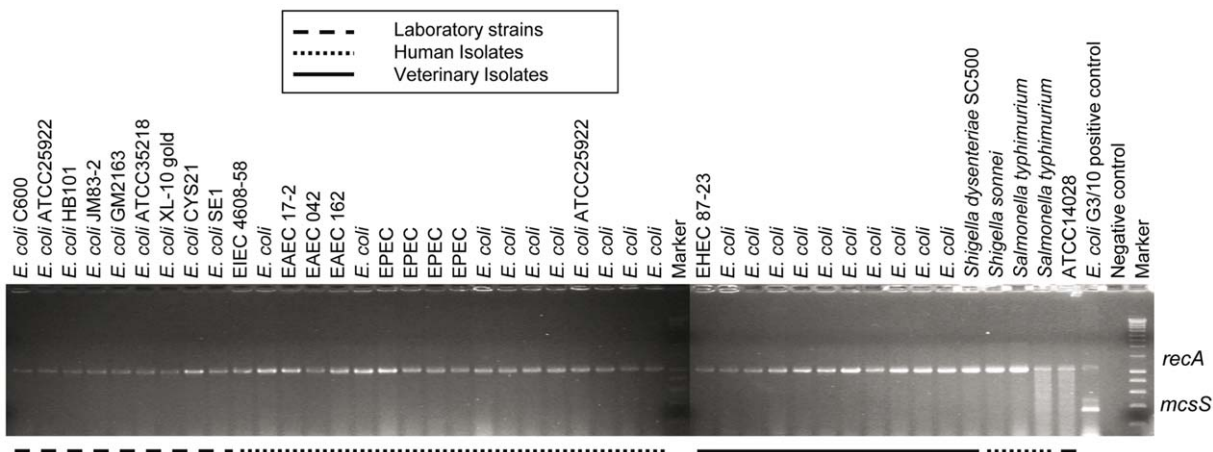

**Figure 6. Multiplex PCR to screen for presence of *mcsS* using *recA* as inhibition control.** The tested strains are common laboratory strains, human clinical isolates and veterinary isolates of different origin. *mcsS* could not be detected in any of the tested strains while the amplified inhibition control indicated that all PCR reactions were truly negative.  
doi:10.1371/journal.pone.0033351.g006

**Table 2.** Bacterial strains used in this study.

| Strain                                  | Relevant genotype                                                                 | Origin                                              |
|-----------------------------------------|-----------------------------------------------------------------------------------|-----------------------------------------------------|
| <i>E. coli</i> Nissle 1917 DSM6601 [42] | Wild-type                                                                         | Mutaflor, Ardeypharm                                |
| EcNDS20                                 | ? <i>mcmA</i> , ? <i>mchB</i>                                                     | This work                                           |
| EcNDS23                                 | ? <i>mcmA</i>                                                                     | This work                                           |
| EcNDS24                                 | ? <i>mchB</i>                                                                     | This work                                           |
| <i>E. coli</i> G1/2                     | Wild-type                                                                         | Symbioflor 2 <sup>3</sup> , SymbioPharm             |
| <i>E. coli</i> G3/10                    | Wild-type                                                                         | Symbioflor 2 <sup>3</sup> , SymbioPharm             |
| <i>E. coli</i> G4/9                     | Wild-type                                                                         | Symbioflor 2 <sup>3</sup> , SymbioPharm             |
| <i>E. coli</i> G5                       | Wild-type                                                                         | Symbioflor 2 <sup>3</sup> , SymbioPharm             |
| <i>E. coli</i> G6/7                     | -type Wild                                                                        | Symbioflor 2 <sup>3</sup> , SymbioPharm             |
| <i>E. coli</i> G8                       | Wild-type                                                                         | Symbioflor 2 <sup>3</sup> , SymbioPharm             |
| <i>E. coli</i> MDS42 [23]               | <i>E. coli</i> K-12 multiple deletion strain                                      | F. Blattner, University of Wisconsin - Madison, USA |
| EPEC E2348/69 [20]                      | Amp <sup>r</sup> (pUC19), Kana <sup>r</sup> (pUC4k) or Cm <sup>r</sup> (pACYC184) | Human isolate                                       |

<sup>a</sup>DSM17252; EcNDS = *E. coli* Nissle 1917 deletion strain; Amp<sup>r</sup> = ampicillin resistance; Kana<sup>r</sup> = kanamycin resistance; Cm<sup>r</sup> = chloramphenicol resistance. doi:10.1371/journal.pone.0033351.t002

activator-promoter. When microcin S production was induced with L-arabinose in *E. coli* MDS42 growing in liquid culture, viable counts dropped by several logs, clearly indicating a direct

toxic activity of MccS against a susceptible *E. coli* strain. MccS from *E. coli* G3/10 has the great advantage that the microcin does not necessarily have to be purified from the strain. Since *E. coli*

**Table 3.** Oligonucleotide primers used in this study.

| Oligonucleotide | Sequence (5' → 3')                                                  | Function                         |
|-----------------|---------------------------------------------------------------------|----------------------------------|
| mcm-H1          | cttaagcgttcatagaccattatcatataatgaagcaccgattgtgtaggctggagctgcttc     | EcN deletion primer              |
| mcm-H2          | gaattttacttctcacaatcttatagcgaaggtgtgaaatggccatagaatcctcctta         | EcN deletion primer              |
| mch-H1          | atcaacgactgtaaatcatatcttcatcagtaaagtggtgaacgattgtgtaggctggagctgcttc | EcN deletion primer              |
| mch-H2          | ggcagggctggaaaacggaagtaaatatgatggagtttatgttccatagaatcctcctta        | EcN deletion primer              |
| mcm_for         | cgctcggaggagcctaac                                                  | EcN deletion primer/sequencing   |
| mcm_rev         | gattcatgggattcgaagg                                                 | EcN deletion primer/sequencing   |
| Contig49_for    | cagctggatcctcgcg                                                    | pSYM1 sequencing primer          |
| Contig49_rev    | ggttcccggcatccaacg                                                  | pSYM1 sequencing primer          |
| pSYM1-SallHF    | tcaattgtgctgactcaattactctgtgag                                      | pAZ6/pAZ8 cloning primer         |
| pSYM1-NheI      | catgtaatagtgctagcatgtaaaattataag                                    | pAZ6 cloning primer              |
| pSYM1-NheIac    | caaaaataatagctagcaagtgatgtttgtaatg                                  | pAZ8, pAZ12 cloning primer       |
| ac-EcoRI        | ctcgaattcatcattcaaaacatcac                                          | pAZ9 cloning primer              |
| ac-PstI         | ctggctgcagtaattgttcaggaagtaacg                                      | pAZ9 cloning primer              |
| pSYM1_44-EcoRI  | taggaattcagaggaactattggtggg                                         | pAZ10 cloning primer             |
| pSYM1_44-PstI   | ctccgctgcagacttactatcgactacaggtaccac                                | pAZ10 cloning primer             |
| ab-EcoRI        | gttagaattcataagagggttttatgtcaaatc                                   | pAZ11 cloning primer             |
| ab-PstI         | gttgatactgcagcttatcgactacaggtaccac                                  | pAZ11 cloning primer             |
| pAZ9-HindIII    | cccaagcttagttaaagtgtgtaagtctgctc                                    | pAZ12 cloning primer             |
| pAZ9-Sall       | ggcatcggctgacgcaac                                                  | pAZ12 cloning primer             |
| pSYM1_43-NheI   | cattgctagccatcacagataaactggataac                                    | pAZ14 cloning primer             |
| pSYM1_43-Sall   | ccctgagctgactcatggtataaaatatttg                                     | pAZ13, pAZ14 cloning primer      |
| recA-ff         | atggctatcgacgaaaacaac                                               | Multiplex PCR inhibition control |
| recA-rev        | ttaaaaactctcgttagttctgctc                                           | Multiplex PCR inhibition control |
| mcsS-ff         | atgcaaatatcagagaattgag                                              | mcsS PCR screening primer        |
| mcsS-rev        | ttatcgactacaggtaccac                                                | mcsS PCR screening primer        |

Oligonucleotides were synthesized by Biomers, Ulm, Germany. doi:10.1371/journal.pone.0033351.t003

G3/10 is set out in a probiotic formulation that can be used for treatment of gastrointestinal disorders, MccS is very much likely to also be expressed effectively *in vivo*, rendering this beneficial microorganism a promising biological drug with prophylactic capacities against enteric pathogens such as Salmonella, Shigella or diarrheagenic *E. coli*.

## Materials and Methods

### Bacterial Strains and Growth Conditions

Bacterial strains used in this work are listed in table 2. Bacteria were grown in Luria Bertani (LB) medium or on LB agar plates (Becton Dickinson, BD, Heidelberg, Germany). Culture media were supplemented with ampicillin ( $100 \mu\text{g ml}^{-1}$ ), chloramphenicol ( $25 \mu\text{g ml}^{-1}$ ), kanamycin ( $50 \mu\text{g ml}^{-1}$ ), tetracyclin ( $12.5 \mu\text{g ml}^{-1}$ ) or streptomycin ( $30 \mu\text{g ml}^{-1}$ ) as required. Antibiotics were purchased from AppliChem, Darmstadt, Germany.

### Construction of EcN Microcin Deletion Mutants

EcN mutants negative for chromosomally encoded microcins M and H47 (*mcmA*, *mchB*) were constructed with a PCR-based one-step inactivation method [32,33]. Deletions were controlled by PCR using primer pairs outlined in table 3 as well as automated DNA sequencing based on dideoxy chain termination method [34], using an ABI 3100 sequencing instrument (Life Technologies, Darmstadt, Germany).

### Construction of Plasmids Used for Functional Characterization of the Microcin S Operon

The targeted sequence was amplified by PCR using oligonucleotides with 5' restriction sites (Table 3). Due to their proofreading capacity, PCR was performed with Phusion High-Fidelity DNA-Polymerase (Thermo Fisher Scientific/Finnzymes, Vantaa, Finland) according to the recommended protocol. Following purification of PCR products with columns containing silica membranes (Qiagen, Hilden, Germany), fragments were digested with the respective restriction enzymes (New England Biolabs, NEB, Frankfurt (Main), Germany) and ligated into an appropriate vector using T4 DNA-Ligase (NEB). Ligated DNA constructs were then transformed to competent bacteria by electroporation (2.5 kV; 400  $\Omega$ ; 25  $\mu\text{FD}$ ) using a Bio-Rad Gene Pulser II and Pulse Controller Plus (Munich, Germany). Clones were selected on LB agar plates containing the appropriate antibiotic and were confirmed by PCR, DNA sequencing and by restriction digest using the respective enzymes.

### Conjugation Experiments

The conjugative plasmid pSYM1 allows the transfer to a recipient strain. pSYM1 was mobilized from *E. coli* G3/10 into *E. coli* G4/9 following a protocol published by Miller et al. [35] with slight modifications. *E. coli* G4/9 was chosen as the recipient strain because it is closely related to *E. coli* G3/10 and harbors only one natural plasmid (unpublished data). Since donor and recipient require dissimilar antibiotic resistance, suicide vector pST76-A, containing an ampicillin resistance cassette and a temperature-sensitive origin of replication, was integrated into pSYM1 by homologous recombination, resulting in pSYM1-ST76An. Then, recipient strain *E. coli* G4/9 was transformed with pACYC184 conferring it with chloramphenicol resistance. Donor *E. coli* G3/10 and recipient *E. coli* G4/9 were grown in LB medium to an absorbance of  $A_{600} \sim 0.5$  to 1, each containing the appropriate antibiotic. Cells were pelleted in a bench top centrifuge at 5000 g for 10 min, washed twice with phosphate buffered saline (PBS) and resuspended in LB medium. Donor and recipient were mixed 2:1,

pelleted and resuspended in a small volume of LB medium ( $\sim 100 \mu\text{l}$ ). The cell suspension was plated on blood agar (BD) and incubated overnight at  $37^\circ\text{C}$ . Bacteria were resuspended in 1 ml LB medium, diluted in PBS and plated on MacConkey agar (BD) containing  $25 \mu\text{g ml}^{-1}$  chloramphenicol and  $100 \mu\text{g ml}^{-1}$  ampicillin (AppliChem). The resulting clones were confirmed by PCR.

### Sequencing and Annotation of pSYM1

Plasmid pSYM1 was discovered as one of six wild-type plasmids in *E. coli* strain G3/10. The genome of the strain was obtained by pyrosequencing with a 454 GS-FLX System (Roche, Basel, Switzerland) (unpublished data). About ninety-five percent of the plasmid sequence was amassed during genome sequencing and assembly. Then, primers for an outwardly directed primer walking strategy were designed (Table 3) until a completely closed plasmid sequence was obtained. Annotation was performed automatically at CeBiTec followed by manual revision using GenDB 2.4 software [36]. BLASTn and BLASTp searches were done using the National Center for Biotechnology Information (NCBI) website [37].

### LOVO and CACO-2 Cell Culture Conditions

The human intestinal epithelial cell lines LOVO [38] and CACO-2 [39], purchased from DSMZ [40], were grown in RPMI-1640 cell culture medium (Biochrom, Berlin, Germany) supplemented with 10% FCS (Biochrom) and maintained in an atmosphere of 5%  $\text{CO}_2$  at  $37^\circ\text{C}$ . Cells reached confluency after 3–4 days and were used consistently within 3–4 days from seeding. Cell cultures were tested routinely and found to be free from mycoplasma contamination.

### In vitro Adherence Assay

An *in vitro* adherence assay was performed according to a modified protocol from Kleta et al. [21]. Briefly, human intestinal epithelial LOVO or CACO-2 cells were seeded in 24-well plates and grown to confluency. Bacterial strains to be tested were grown in LB broth to an absorbance of  $A_{600} \sim 0.6$ , whereas the adherent enteropathogenic *E. coli* strain E2348/69 was grown to  $A_{600} \sim 1$ , each supplemented with the appropriate antibiotic. One ml of each bacterial strain was pelleted, washed with PBS and resuspended in cell culture medium. LOVO and CACO-2 cells were infected with the bacteria to be tested at a multiplicity of infection (MOI) of 100:1 *E. coli* to host cells. After an incubation period of two hours at  $37^\circ\text{C}$  and 5%  $\text{CO}_2$  bacteria were washed away with PBS for three times and host cells were infected with EPEC. Bacteria were allowed to adhere for six hours in total ( $37^\circ\text{C}$ , 5%  $\text{CO}_2$ ), while the cell culture medium was replaced after three hours of incubation. Cells were washed with PBS and lysed with 0.01% Triton-X-100 in PBS (Sigma-Aldrich, Munich, Germany). The number of adherent EPEC was determined by plating serial dilutions on LB agar plates containing the appropriate antibiotic. Adherence efficiency in percentage is expressed as adherence of EPEC relative to the adherence without any pre-incubation (negative control), which is set at 100%. All strains were tested in at least three independent experiments.

### Screening of mcsS Presence in Enterobacteria

Gene *mcsS* encoding microcin S was amplified by a multiplex PCR protocol from culture material, using *recA* as an inhibition control. Oligonucleotides were used as indicated in table 3. *E. coli* G3/10 served as positive control. Thirty-eight different *E. coli*, two Shigella and two Salmonella strains were screened. To our



knowledge, none of the isolates tested has been sequenced. Strains are common lab strains as well as isolates of human or animal origin as indicated in figure 6.

### Statistical Analysis

Data are expressed as mean  $\pm$  SD. Student's *t*-test was used to determine the statistical significance.  $p \leq 0.05$  was considered statistically significant.

### Nucleotide Sequence Accession Number of pSYM1

The pSYM1 plasmid sequence has been deposited in the GenBank sequence database with the accession number JN887338.

### References

- Chiuchiolo MJ, Delgado MA, Farias RN, Salomon RA (2001) Growth-phase-dependent expression of the cyclopeptide antibiotic microcin J25. *J Bacteriol* 183: 1755–1764.
- Connell N, Han Z, Moreno F, Kolter R (1987) An *E. coli* promoter induced by the cessation of growth. *Mol Microbiol* 1: 195–201.
- Fomenko D, Veselovskii A, Khmel I (2001) Regulation of microcin C51 operon expression: the role of global regulators of transcription. *Res Microbiol* 152: 469–479.
- Hernandez-Chico C, San Millan JL, Kolter R, Moreno F (1986) Growth phase and ompR regulation of transcription of microcin B17 genes. *J Bacteriol* 167: 1058–1065.
- Baquero F, Bouanchaud D, Martinez-Perez MC, Fernandez C (1978) Microcin plasmids: a group of extrachromosomal elements coding for low-molecular-weight antibiotics in *Escherichia coli*. *J Bacteriol* 135: 342–347.
- Novoa MA, Diaz-Guerra L, San Millan JL, Moreno F (1986) Cloning and mapping of the genetic determinants for microcin C7 production and immunity. *J Bacteriol* 168: 1384–1391.
- O'Brien GJ, Mahanty HK (1994) Colicin 24, a new plasmid-borne colicin from a uropathogenic strain of *Escherichia coli*. *Plasmid* 31: 288–296.
- Salomon RA, Farias RN (1992) Microcin 25, a novel antimicrobial peptide produced by *Escherichia coli*. *J Bacteriol* 174: 7428–7435.
- San Millan JL, Hernandez-Chico C, Pereda P, Moreno F (1985) Cloning and mapping of the genetic determinants for microcin B17 production and immunity. *J Bacteriol* 163: 275–281.
- Waters VL, Crosa JH (1991) Colicin V virulence plasmids. *Microbiol Rev* 55: 437–450.
- Poey ME, Azpiroz MF, Lavina M (2006) Comparative analysis of chromosome-encoded microcins. *Antimicrob Agents Chemother* 50: 1411–1418.
- Patzner SI, Baquero MR, Bravo D, Moreno F, Hantke K (2003) The colicin G, H and X determinants encode microcins M and H47, which might utilize the catecholate siderophore receptors FepA, Cir, Fiu and Iron. *Microbiology* 149: 2557–2570.
- Enck P, Zimmermann K, Menke G, Klosterhalfen S (2009) Randomized controlled treatment trial of irritable bowel syndrome with a probiotic *E. coli* preparation (DSM17252) compared to placebo. *Z Gastroenterol* 47: 209–214.
- Martens U, Enck P, Zieseniss E (2010) Probiotic treatment of irritable bowel syndrome in children. *Ger Med Sci* 8: Doc07.
- Guarner F, Schaafsma GJ (1998) Probiotics. *Int J Food Microbiol* 39: 237–238.
- Kuipers A, Rink R, Moll GN (2011) Genetics, Biosynthesis, Structure, and Mode of Action of Lantibiotics. In: Drider D, Rebuffat S, eds. *Prokaryotic Antimicrobial Peptides: From Genes to Applications*. Berlin: Springer. pp 147–169.
- Hetz C, Bono MR, Barros LF, Lagos R (2002) Microcin E492, a channel-forming bacteriocin from *Klebsiella pneumoniae*, induces apoptosis in some human cell lines. *Proc Natl Acad Sci U S A* 99: 2696–2701.
- Dicks LMT, Heunis TDJ, van Staden DA, Brand A, Sutyak Noll K, et al. (2011) Medical and Personal Care Applications of Bacteriocins Produced by Lactic Acid Bacteria. In: Drider D, Rebuffat S, eds. *Prokaryotic Antimicrobial Peptides: From Genes to Applications*. Berlin: Springer. pp 392–421.
- Gillor O, Kirkup BC, Riley MA (2004) Colicins and microcins: the next generation antimicrobials. *Adv Appl Microbiol* 54: 129–146.
- Donnenberg MS, Kaper JB (1992) Enteropathogenic *Escherichia coli*. *Infect Immun* 60: 3953–3961.
- Kleta S, Steinrück H, Breves G, Duncker S, Laturnus C, et al. (2006) Detection and distribution of probiotic *Escherichia coli* Nissle 1917 clones in swine herds in Germany. *J Appl Microbiol* 101: 1357–1366.
- Ong CL, Beatson SA, McEwan AG, Schembri MA (2009) Conjugative plasmid transfer and adhesion dynamics in an *Escherichia coli* biofilm. *Appl Environ Microbiol* 75: 6783–6791.
- Pósfai G, Plunkett III G, Fehér T, Frisch D, Keil GM, et al. (2006) Emergent Properties of Reduced-Genome *Escherichia coli*. *Science* 312: 1044–1046.
- Asensio C, Perez-Diaz JC (1976) A new family of low molecular weight antibiotics from enterobacteria. *Biochem Biophys Res Commun* 69: 7–14.
- Finn RD, Mistry J, Tate J, Coggill P, Heger A, et al. (2010) The Pfam protein families database. *Nucleic Acids Res* 38: D211–D222.
- Duquesne S, Destoumieux-Garzon D, Peduzzi J, Rebuffat S (2007) Microcins, gene-encoded antibacterial peptides from enterobacteria. *Nat Prod Rep* 24: 708–734.
- Rebuffat S (2011) Bacteriocins from Gram-Negative Bacteria: A Classification? In: Drider D, Rebuffat S, eds. *Prokaryotic Antimicrobial Peptides: From Genes to Applications*. Berlin: Springer. pp 55–80.
- Havarstein LS, Holo H, Nes IF (1994) The leader peptide of colicin V shares consensus sequences with leader peptides that are common among peptide bacteriocins produced by gram-positive bacteria. *Microbiology* 140 (Pt 9): 2383–2389.
- Pons AM, Delalande F, Duarte M, Benoit S, Lanneluc I, et al. (2004) Genetic analysis and complete primary structure of microcin L. *Antimicrob Agents Chemother* 48: 505–513.
- Holland IB, Schmitt L, Young J (2005) Type 1 protein secretion in bacteria, the ABC-transporter dependent pathway. *Mol Membr Biol* 22: 29–39.
- Chehade H, Braun V (1988) Iron-regulated synthesis and uptake of colicin V. *FEMS Microbiology Letters* 52: 177–181.
- Datsenko KA, Wanner BL (2000) One-step inactivation of chromosomal genes in *Escherichia coli* K-12 using PCR products. *Proc Natl Acad Sci U S A* 97: 6640–6645.
- Zhang Y, Buchholz F, Muylers JP, Stewart AF (1998) A new logic for DNA engineering using recombination in *Escherichia coli*. *Nat Genet* 20: 123–128.
- Sanger F, Nicklen S, Coulson AR (1992) DNA sequencing with chain-terminating inhibitors. 1977. *Biotechnology* 24: 104–108.
- Miller HJ (1992) *A Short Course in Bacterial Genetics: A Laboratory Manual and Handbook for Escherichia coli and Related Bacteria*. Harbor Cold Spring, N.Y.: Cold Spring Harbor Laboratory Press. 876 p.
- Meyer F, Goesmann A, McHardy AC, Bartels D, Bekel T, et al. (2003) GenDB—an open source genome annotation system for prokaryote genomes. *Nucleic Acids Res* 31: 2187–2195.
- Altschul SF, Gish W, Miller W, Myers EW, Lipman DJ (1990) Basic local alignment search tool. *J Mol Biol* 215: 403–410.
- Drewinko B, Yang LY, Barlogie B, Romsdahl M, Meistrich M, et al. (1978) Further biologic characteristics of a human carcinoembryonic antigen-producing colon carcinoma cell line. *J Natl Cancer Inst* 61: 75–83.
- Rousset M (1986) The human colon carcinoma cell lines HT-29 and Caco-2: two in vitro models for the study of intestinal differentiation. *Biochimie* 68: 1035–1040.
- Drexler HG, Dirks W, MacLeod RAF, Quentmeier H, Steube KG, et al. (2001) DSMZ Catalogue of human and animal cell lines. 8th ed.
- Grant JR, Stothard P (2008) The CGView Server: a comparative genomics tool for circular genomes. *Nucleic Acids Res* 36: W181–W184.
- Nissle A (1916) Über die Grundlagen einer neuen ursächlichen Bekämpfung der pathologischen Darmflora. *Dt Med Wschr* 42: 1181–1184.
- Pósfai G, Koob MD, Kirkpatrick HA, Blattner FR (1997) Versatile insertion plasmids for targeted genome manipulations in bacteria: isolation, deletion, and rescue of the pathogenicity island LEE of the *Escherichia coli* O157:H7 genome. *J Bacteriol* 179: 4426–4428.

### Acknowledgments

We would like to thank F. Ch. Bange for very helpful discussions and Michael J. Schubert for critically reading the manuscript.

### Author Contributions

Conceived and designed the experiments: FG AZ. Performed the experiments: AZ. Analyzed the data: AZ KZ CP FG. Contributed reagents/materials/analysis tools: KZ JB AG CP. Wrote the paper: AZ FG.
